# Supplementary material
Source: publisher site journal article supplement (https://www.dovepress.com/article/429157)
Supplement: Supplementary file 1 [file get_supplementary_file.php]

**Supplementary Materials**

****Shi-tong Diao, MD1, Run Dong, MD1, Jin-min Peng, MD1,** **Yan Chen, MD1,** **Shan Li, MD1, Shu-hua He, MD1, Yi-fan Wang,**** ****MD1,** **Bin Du, MD1, Li Weng, MD1 for the China Critical Care Clinical Trials Group (CCCCTG)****

1Medical Intensive Care Unit, State Key Laboratory of Complex Severe and Rare Diseases, Peking Union Medical College Hospital, Peking Union Medical College & Chinese Academy of Medical Sciences, Beijing, China

***Correspondence**

Li Weng, MD

wengli@gmail.com

Medical Intensive Care Unit, State Key Laboratory of Complex Severe and Rare Diseases, Peking Union Medical College Hospital, Peking Union Medical College & Chinese Academy of Medical Sciences, 1 Shuai Fu Yuan, Beijing 100730, China

**Content**

[Table S1. A review of previous studies on the validation of ICD strategies to identify sepsis cases. 3](#_Toc148366717)

[Table S2. Sequential Organ Failure Assessment (SOFA) Score and Simplified Organ Dysfunction Criteria Optimized for Electronic Health Records (eSOFA) For Diagnosing Sepsis 6](#_Toc148366718)

[Table S3. Diagnostic Criteria for Major Types Of Infection 8](#_Toc148366719)

[Table S4. International Statistical Classification of Diseases And Related Health Problems 10th Revision (ICD-10) Version For Diagnosis Of Acute Infection 12](#_Toc148366720)

[Table S5. International Statistical Classification of Diseases And Related Health Problems 10th Revision (ICD-10) Version For Acute Organ Dysfunction Related Diagnosis 20](#_Toc148366721)

[Table S6. International Statistical Classification Of Diseases And Related Health Problems, 9th Revision, Clinical Modification, 3rd Volume(ICD-9-CM-3) Version for Acute Organ Dysfunction Related Procedures 25](#_Toc148366722)

[Table S7. Martin GS's Coding According To ICD-9-CM Version for Infection 26](#_Toc148366723)

[Table S8. Martin GS's Coding According To ICD-9-CM Version for Acute Organ Dysfunction 27](#_Toc148366724)

[Table S9. Angus DC's Coding According To ICD-9-CM Version for Infection 28](#_Toc148366725)

[Table S10. Angus DC's Coding According To ICD-9-CM Version for Acute Organ Dysfunction 31](#_Toc148366726)

[Table S11. Weighted index of Charlson comorbidity 32](#_Toc148366727)

[Table S12. Positive and negative likelihood ratios of Different ICD-Coded Algorithms and eSOFA Criteria for Identification of Sepsis 33](#_Toc148366728)

[Figure S1. Accuracy of ICD codes from different provinces from Hospital Quality Monitoring System (HQMS) https://www.hqms.org.cn/login.jsp13 34](#_Toc148366729)

# Table S1. A review of previous studies on the validation of ICD strategies to identify sepsis cases.

|  | Author | | Year of data | | ICD version | | Study type | | Wards | | Sensitivity | | Specificity | | PPV | NPV | Standard |
| --- | --- | --- | --- | --- | --- | --- | --- | --- | --- | --- | --- | --- | --- | --- | --- | --- | --- |
| 1 | Greg S. Martin  2003 (1) | | 1979-2000 | | ICD-9-CM | | Retrospective | | All wards | | - | | - | | 0.889 | 0.800 | Sepsis 1  SIRS |
| 2 | Stacey-Ann 2013 (2) | | 2005-2009 | | ICD-9 | | Retrospective | | Non-ICU | | 0.472 | | - | | - | - | Sepsis 1  SIRS |
| 3 | Theodore J. Iwashyna  2014(3) | | 2019-2010 | | ICD-9-CM | | Retrospective | | Non-ICU | | 0.503 | | 0.963 | | 0.707 | 0.915 | Sepsis 2 |
|  |  | |  | |  | |  | |  | | 0.093 | | 1.0 | | 1.0 | 0.860 |  |
|  |  | |  | |  | |  | |  | | 0.168 | | 0.999 | | 0.976 | 0.870 |  |
| 4 | R. Gedebor  2006(4) | | 1994-1999 | | ICD-9 | | Retrospective | | ICU | | 0.457 | | 0.975 | | 0.459 | 0.975 | Database diagnose |
|  |  | |  | | ICD-10 | | - | | - | | 0.525 | | 0.926 | | 0.28 | 0.973 |  |
| 5 | Rajesh Ramanathan,2013(5) | | 2012-2013 | | ICD-9-CM | | Retrospective | | Surgery | | 0.823 | | 0.783 | | 0.911 | 0.621 | Sepsis 1  （SIRS） |
| 6 | Rachel J Jolley  2015(6) | | 2009-2012 | | ICD-10 | | Retrospective | | ICU | | 0.464 | | 0.987 | | 0.982 | 0.547 | Sepsis 2 |
|  |  | |  | |  | |  | | ICU | | 0.719 | | 0.854 | | 0.882 | 0.666 | Sepsis 2 |
|  |  | |  | |  | |  | | Non-ICU | | 0.067 | | 1.0 | | 1.0 | 0.93 | Sepsis 2 |
|  |  | |  | |  | |  | | Non-ICU | | 0.25 | | 1.0 | | 1.0 | 0.985 | Sepsis 2 |
| 7 | Chanu Rhee  2017(7) | | 2009-2014 | | EHR | | Retrospective | | All wards | | 0.697 | | 0.981 | | 0.704 | 0.980 | Sepsis-3 |
|  |  | |  | | ICD-9-CM | |  | |  | | 0.323 | | 0.993 | | 0.957 | 0.752 | Sepsis-3 |
|  |  | |  | | ICD-9-CM | |  | |  | | 0.660 | | 0.904 | | 0.976 | 0.310 | Sepsis-3 |
|  |  | |  | |  | |  | |  | |  | |  | |  |  |  |
| 8 | Chanu Rhee  2019(8) | | 2013-2014 | | ICD-9-CM | | Retrospective | | All wards | | 0.42-0.8 | | - | | - | - | Esofa |
| 9 | Jared A. Greenberg  2015(9) | | 2010-2012 | | ICD-9 | | Retrospective | | All wards | | 0.874 | | 0.976 | | 0.944 | 0.943 | Sepsis 1  SIRS |
| 10 | Carolin Fleischmann-Struzek，  2018(10) | | 2007-2013 | | ICD-10-GM | | Retrospective | | All wards | | 0.419  0.59  0.251 | | 0.994  0.957  0.996 | | 59.6  0.221  0.561 | 98.8  0.991  0.988 | Sepsis 1 |
| 11 | Marisa Cevasco,  2010(11) | | 2003-2007 | | ICD-9-CM | | Retrospective | | General surgery | | - | | - | | 0.53 | - | PSI |
|  |  | |  | |  | |  | |  | |  | |  | |  |  |  |
|  |  |  | |  | |  | |  | |  | |  | |
| 12 | Ibrahim I,  2012(12) | | 2000-2006 | | ICD-10-  AM | | Retrospective | | EICU | | 0.071 | | 0.996 | | 0.783 | 0.855 | Specific definition |
|  |  | |  | |  | |  | |  | | 0.165 | | 0.998 | | 0.939 | 0.868 |  |

# Table S2. Sequential Organ Failure Assessment (SOFA) Score and Simplified Organ Dysfunction Criteria Optimized for Electronic Health Records (eSOFA) For Diagnosing Sepsis

| System | SOFA | |  | eSOFA | |
| --- | --- | --- | --- | --- | --- |
| score | Criteria |  | score | Criteria |
| Cardiovascular | 1 | Mean arterial pressure < 70 mm Hg |  | 1 | Vasopressor initiation |
|  | 2 | Dopamine ≤ 5 μg/kg/min or dobutamine (any dose) |  |
|  | 3 | Dopamine > 5 or epinephrine ≤ 0.1 or norepinephrine ≤ 0.1 μg/kg/min |  |
|  | 4 | Dopamine > 15 or epinephrine > 0.1 or norepinephrine > 0.1 μg/kg/min |  |
| Respiratory | 1 | PaO2/FiO2 300–399 |  | 1 | Mechanical ventilation initiation (> 1 calendar day required between vent episodes) |
|  | 2 | PaO2/FiO2 200–299 |  |
|  | 3 | PaO2/FiO2 100–199 and ventilated |  |
|  | 4 | PaO2/FiO2 ratio < 100 and ventilated |  |
| Renal | 1 | Creatinine 1.2–1.9 mg/dL |  | 1 | 2× Creatinine or ↓≥ 50% of eGFR relative to baseline (excluding patients with end- stage renal disease) |
|  | 2 | Creatinine 2.0–3.4 mg/dL |  |
|  | 3 | Creatinine 3.5–4.9 mg/dL or UO < 500 ml/d |  |
|  | 4 | Creatinine > 5.0 mg/dL or UO < 200 ml/d |  |
| Hepatic | 1 | Bilirubin 1.2–1.9 mg/dL |  | 1 | Bilirubin ≥ 2.0 mg/dL and ↑2× from baseline |
|  | 2 | Bilirubin 2.0–5.9 mg/dL |  |
|  | 3 | Bilirubin 6.0–11.9 mg/dL |  |
|  | 4 | Bilirubin > 12.0 mg/dL |  |
| Coagulation | 1 | Platelets 100–149 cells/μL |  | 1 | Platelet count < 100 cells/μL and ↓≥ 50% from baseline (baseline must be ≥ 100 cells/μL) |
|  | 2 | Platelets 50–99 cells/μL |  |
|  | 3 | Platelets 20–49 cells/μL |  |
|  | 4 | Platelets < 20 cells/μL |  |
| Neuro | 1 | Glasgow Coma Scale score 13–14 |  |  | NA |
|  | 2 | Glasgow Coma Scale score 10–12 |  |
| Perfusion |  | NA |  | 1 | Lactate ≥ 2.0 mmol/L |

NA=not applicable; PaO2=partial pressure of oxygen; FiO2=fraction of inspired oxygen

# Table S3. Diagnostic Criteria for Major Types Of Infection

| **Site of infection** | **Reference Criteria** |
| --- | --- |
| Lung [1] | New infiltrates on chest imaging studies  2 or more symptoms consistent with pneumonia, including cough, fever, sputum production, dyspnea, breathlessness, and pleuritic chest pain |
| Urinary tract [2] | One of:   - Organism isolated from culture of fluid (other than urine) or tissue from the affected site - An abscess or other evidence of infection seen on direct examination during surgery or by histopathology examination   Or two of:   - Fever (>38°C), Urgency, Localized pain or tenderness at involved site   Or any one of:   - microscopic examination (urinalysis or Gram stain) with pyuria or 105 colony forming unit (cfu)/ml; purulent drainage from the affected site; pyuria; hematuria; organism isolated from urine culture; positive Gram stain; radiographic evidence of infection (eg, ultrasound, computed tomography, magnetic resonance imaging, radiolabeled scan). |
| Abdomen | ● Acute cholecystitis [3]  Symptoms of right upper quadrant or epigastric abdominal pain  Leukocytosis (>12,000) and/or Fever (>38°C)  Image evidence of thickened gallbladder wall secondary to edema, gallstones or sludge, and pericholecystic fluid  ● Acute cholangitis [4]  Presence of the Charcot triad or, in their absence, the presence of any two elements of the Charcot triad plus laboratory evidence of an inflammatory response (that is, abnormal white  count, increased levels of C­reactive protein or other changes indicative of inflammation)  Abnormal liver test results (that is, abnormal levels of alkaline phosphatase, γ­glutamyl transpeptidase, aspartate aminotransferase or alanine aminotransferase)  Imaging findings of biliary dilation or evidence of etiology (for example, the presence of a stone, stricture or stent).  ● Acute appendicitis [5]  Migration of pain to the right lower quadrant and/or unspecific symptoms like nausea, vomiting, anorexia  leukocytosis (>12,000) and/or fever (>38°C)  Image evidence of appendicolith  ● Primary peritonitis [6]  Primary peritonitis (also referred to as spontaneous bacterial peritonitis) is defined as a microbial infection of the peritoneal fluid in the absence of a gastrointestinal perforation, abscess, or other localized infection within the gastrointestinal tract  Microbiologically confirmed: the presence of a clinically compatible presentation of primary peritonitis with the isolation of microbial pathogens (in peritoneal fluid or blood) along with evidence of acute inflammatory reaction within the peritoneal fluid (i.e., >500 leukocytes/mL) with a neutrophilic predominance, an ascitic fluid pH of <7.35 (arterial to ascitic pH difference of >0.1), or a lactate concentration of >2.5 mg/L  Probable: Clinically appropriate setting with evidence of an inflammatory ascitic fluid (>500 leukocytes/mL with a neutrophil predominance) in the presence of a positive Gram stain but negative peritoneal fluid cultures or in the presence of a positive blood culture for a pathologic organism with inflammatory cells in ascitic fluid  Possible: A compatible clinical illness with an inflammatory peritoneal fluid (500 leukocytes/mL) in the absence of a positive culture (in peritoneal fluid or blood) or Gram stain  ● Secondary peritonitis [6]  Secondary peritonitis is a microbial infection of the peritoneal space following perforation, abscess formation, ischemic necrosis, or penetrating injury of the intra-abdominal contents  Microbiologically confirmed: Isolation of one or more microbial pathogens found in the peritoneum or the blood >24 hrs after a gastrointestinal perforation of the stomach, esophagus or duodenum, or any perforation of the small bowel distal to the ligament of Treitz. Spillage of luminal contents during an operative procedure is not sufficient evidence of perforation that allows for definitive diagnosis of peritonitis. Furthermore, a  penetrating abdominal wound or documented perforation that is surgically repaired within 12 hrs of its occurrence is not sufficient evidence to support diagnosis of secondary bacterial peritonitis.  Probable: Compatible clinical illness associated with documented evidence of perforation (free air in the abdomen on radiographic studies or surgical confirmation of peritoneal inflammation following luminal perforation in the absence of microbiologically confirmed peritonitis). A Gram stain in the absence of a positive culture from the peritoneum would be considered probable secondary bacterial peritonitis.  Possible: Upper gastrointestinal perforation or penetrating abdominal trauma that is surgically repaired without further evidence of microbiologic confirmation or clinical signs or symptoms supportive of a diagnosis of bacterial or fungal peritonitis.  A finding of an inflammatory peritoneal fluid in the presence of a documented but localized intra-abdominal abscess in the absence of culture confirmation would also be considered possible secondary bacterial peritonitis. |
| Skin and soft tissue [6] | ● Surgical site infections  Arises within 30 days of an operative procedure and at the site of surgical intervention.  Symptoms and signs suggestive of a surgical site infection include wound erythema and blanching, tenderness, pain, purulent discharge, fever(temperature >38.0°C), and leukocytosis.  A superficial surgical site infection involves the skin or subcutaneous tissues alone, whereas a deep surgical site infection involves the fascia or muscle layers, and an organ space surgical site infection involves the deeper anatomic areas opened during the surgical procedure.  ● Nonsurgical site infections  **Cellulitis** is defined as an acute spreading infection of the skin and underlying soft tissue suggested by the presence of a rapidly expanding erythema, local tenderness, pain, swelling, lymphangitis, and lymphadenopathy, which is frequently accompanied by systemic signs and symptoms including malaise, fever (temperature >38.0°C), and chills.  **Necrotizing cellulitis** and **fasciitis** are defined as acute, rapidly progressing, and life-threatening destructive (i.e., necrotizing) infections of the subcutaneous tissues dissecting along tissue planes. Although these two clinical entities exhibit some distinctive clinical and microbial characteristics, they share common features. The symptoms and signs suggestive of necrotizing cellulitis or fasciitis are intense local pain (a cardinal feature), exquisite tenderness, erythema (initially discrete but evolving to red-purple and then blue-gray cutaneous lesions often with hemorrhagic bullae), swelling, edema, crepitations (in the case of necrotizing cellulitis), and extensive tissue necrosis, which are associated with prominent systemic toxicity (toxic shock syndrome, severe sepsis, or septic shock) |
| Neurological | ● Bacterial Meningitis [7]  at least 2 of the following 4 symptoms: fever, neck stiffness, headache, or altered mental status  Signs of meningeal irritation sign and/or elevated intracranial pressure  Bacterial evidence of cerebrospinal fluid (WBC>2000 /mm3 or neutrophil >1180 /mm3or positive result from real-time PCR)  ● Brain abscess [8]  Symptoms of compression: headache, nausea, vomiting or altered mental status  CT or MRI reveals pyogenic abscesses |
| Other | ● Bloodstream infection  Patient must meet the following two criteria:  Patient has a recognized pathogen (defined as a microorganism not usually regarded as a common skin contaminant, i.e., diphtheroids, Bacillus species, Propionibacterium species, coagulase-negative staphylococci, or micrococci) cultured from one or more blood cultures  Or A common skin contaminant (e.g., diphtheroids, Bacillus species, Propionibacterium species, coagulase-negative staphylococci, or micrococci) cultured from two or more blood cultures drawn on separate occasions (including one drawn by venipuncture)  And The organism cultured from blood is not related to an infection at another site, including intravascular-access devices  ● Bone and joint infection  Fever, malaise, swollen joint/limited motion, edema overlying bone and/or back pain  Leukocytosis and/or elevated of inflammation/infection  Image evidence reveals bone damage or joint effusion |

Reference

1. Mandell, L.A., et al., *Infectious Diseases Society of America/American Thoracic Society consensus guidelines on the management of community-acquired pneumonia in adults.* Clin Infect Dis, 2007. **44 Suppl 2**: p. S27-72.

2. Nicolle, L.E., *Urinary tract infection.* Crit Care Clin, 2013. **29**(3): p. 699-715.

3. Knab, L.M., A.M. Boller, and D.M. Mahvi, *Cholecystitis.* Surg Clin North Am, 2014. **94**(2): p. 455-70.

4. Lee, J.G., *Diagnosis and management of acute cholangitis.* Nat Rev Gastroenterol Hepatol, 2009. **6**(9): p. 533-41.

5. Bhangu, A., et al., *Acute appendicitis: modern understanding of pathogenesis, diagnosis, and management.* Lancet, 2015. **386**(10000): p. 1278-87.

6. Calandra, T., J. Cohen, and I.C.U.C.C. International Sepsis Forum Definition of Infection in the, *The international sepsis forum consensus conference on definitions of infection in the intensive care unit.* Crit Care Med, 2005. **33**(7): p. 1538-48.

7. Putz, K., K. Hayani, and F.A. Zar, *Meningitis.* Prim Care, 2013. **40**(3): p. 707-26.

8. Muzumdar, D., S. Jhawar, and A. Goel, *Brain abscess: an overview.* Int J Surg, 2011. **9**(2): p. 136-44.

# Table S4. International Statistical Classification of Diseases And Related Health Problems 10th Revision (ICD-10) Version For Diagnosis Of Acute Infection

| Code | Comment |
| --- | --- |
| A00-B99 | Certain infectious and parasitic diseases |
| D73.3 | Abscess of spleen |
| D76.2 | Haemophagocytic syndrome, infection-associated |
| D77 | Other disorders of blood and blood-forming organs in disease classified elsewhere: Fibrosis of spleen in schistosomiasis |
| E06.0 | Acute thyroiditis: abscess of thyroid, thyroiditis (pyogenic, suppurative) |
| E23.607 | Abscess of pituitary |
| E27.802 | Abscess of adrenal gland |
| E32.1 | Abscess of thymus |
| G00 | Bacterial meningitis, not elsewhere classified |
| G01 | Meningitis in bacterial disease classified elsewhere |
| G02 | Meningitis in other infectious and parasitic disease classified elsewhere |
| G04 | Encephalitis, myelitis and encephalomyelitis |
| G05 | Encephalitis, myelitis and encephalomyelitis in diseases classified elsewhere |
| G06 | Intracranial and intraspinal abscess and granuloma |
| G07 | Intracranial and intraspinal abscess and granuloma in diseases classified elsewhere |
| G08 | Intracranial and intraspinal phlebitis and thrombophlebitis |
| G21.3 | Postencephalitic parkinsonism |
| G22 | Parkinsonism in diseases classified elsewhere (syphilitic parkinsonism) |
| G53 | Cranial nerve disorders in diseases classified elsewhere |
| G61 | Inflammatory polyneuropathy |
| G63.0 | Polyneuropathy in infectious and parasitic diseases classified elsewhere |
| G94.0 | Hydrocephalus in infectious and parasitic diseases classified elsewhere |
| H00.0 | Hordeolum and other deep inflammation of eyelid |
| H01.0 | Blepharitis |
| H03 | Disorders of eyelid in diseases classified elsewhere |
| H04.0 | Dacryoadenitis |
| H04.3 | Acute and unspecified inflammation of lacrimal passages |
| H05.0 | Acute inflammation of orbit |
| H10 | Conjunctivitis |
| H13.0 | Filarial infectious of conjunctiva |
| H13.1 | Conjunctivitis in infectious and parasitic diseases classified elsewhere |
| H15.0 | Scleritis |
| H15.1 | Episcleritis |
| H16 | Keratitis |
| H19.0 | Scleritis and episcleritis in diseases classified elsewhere |
| H19.1 | Herpesviral keratitis and keratoconjunctivitis |
| H19.2 | Keratitis and keratoconjunctivitis in other infectious and parasitic diseases classified elsewhere |
| H20 | Iridocyclitis |
| H22.0 | Iridocyclitis in infectious and parasitic diseases classified elsewhere |
| H30 | Chorioretinal inflammation |
| H32.0 | Chorioretinal inflammation in infectious and parasitic diseases classified elsewhere |
| H42.8 | Glaucoma in other diseases classified elsewhere (Glaucoma in onchocerciasis) |
| H44.0 | Purulent endophthalmitis |
| H44.1 | Other endophthalmitis |
| H45.1 | Endophthalmitis in diseases classified elsewhere |
| H48.0 | Optic atrophy in diseases classified elsewhere |
| H48.1 | Retrobulbar neuritis in diseases classified elsewhere |
| H58.8 | Other specified disorders of eye and adnexa in diseases classified elsewhere (syphilitic oculopathy) |
| H60 | Otitis externa |
| H61.0 | Perichondritis of external ear |
| H62.0 | Otitis externa in bacterial diseases classified elsewhere |
| H62.1 | Otitis externa in viral diseases classified elsewhere |
| H62.2 | Otitis externa in mycoses |
| H62.3 | Otitis externa in other infectious and parasitic diseases classified elsewhere |
| H66 | Suppurative and unspecified otitis media |
| H67.0 | Otitis media in bacterial diseases classified elsewhere |
| H67.1 | Otitis media in viral diseases classified elsewhere |
| H68.0 | Eustachian salpingitis |
| H70 | Mastoiditis and related conditions |
| H73.0 | Acute myringitis |
| H73.1 | Chronic myringitis |
| H73.8 | Other specified disorders of tympanic membrane |
| H74.1 | Adhesive middle ear disease |
| H74.8 | Other specified disorders of middle ear and mastoid |
| H75 | Mastoiditis in infectious and parasitic diseases classified elsewhere |
| H81.2 | Vestibular neuronitis |
| H83.0 | Labyrinthitis |
| H92.1 | Otorrhoea |
| H93.3 | Disorders of acoustic nerve |
| H94.0 | Acoustic neuritis in infectious and parasitic diseases classified elsewhere |
| H95.1 | Other disorders following mastoidectomy |
| I00 | Rheumatic fever without mention of heart involvement |
| I01 | Rheumatic fever with heart involvement |
| I02 | Rheumatic chorea |
| I30.1 | Infective pericarditis |
| I32.0 | Pericarditis in bacterial diseases classified elsewhere |
| I32.1 | Pericarditis in other infectious and parasitic diseases classified elsewhere |
| I33.0 | Acute and subacute infective endocarditis |
| I34.8 | Other nonrheumatic mitral valve disorders |
| I35.8 | Other aortic valve disorders |
| I39 | Endocarditis and heart valve disorders in diseases classified elsewhere |
| I40.0 | Infective myocarditis |
| I41.0 | Myocarditis in bacterial diseases classified elsewhere |
| I41.1 | Myocarditis in viral diseases classified elsewhere |
| I41.2 | Myocarditis in other infectious and parasitic diseases classified elsewhere |
| I43.0 | Cardiomyopathy in infectious and parasitic diseases classified elsewhere |
| I52.0 | Other heart disorders in bacterial diseases classified elsewhere |
| I52.1 | Other heart disorders in other infectious and parasitic diseases classified elsewhere |
| I68.1 | Cerebral arteritis in infectious and parasitic diseases classified elsewhere |
| I79.0 | Aneurysm of aorta in diseases classified elsewhere |
| I79.1 | Aortitis in diseases classified elsewhere |
| I80.051 | Suppurative phlebitis of superficial vessels of lower extremities |
| I80.251 | Suppurative phlebitis of other deep vessels of lower extremities |
| I80.351 | Suppurative phlebitis of lower extremities, unspecified |
| I98.0 | Cardiovascular syphilis |
| I98.1 | Cardiovascular disorders in other infectious and parasitic diseases classified elsewhere |
| J00-J06 | Acute upper respiratory infections |
| J09-J18 | Influenza and pneumonia |
| J20-J22 | Other acute lower respiratory infections |
| J32 | Chronic sinusitis |
| J34.0 | Abscess, furuncle and carbuncle of nose |
| J36 | Peritonsillar abscess |
| J37 | Chronic laryngitis and laryngotracheitis |
| J38.3 | Other diseases of vocal cords |
| J38.7 | Other diseases of larynx |
| J39.0 | Retropharyngeal and parapharyngeal abscess |
| J39.1 | Other abscess of pharynx |
| J40 | Bronchitis, not specified as acute or chronic |
| J41 | Simple and mucopurulent chronic bronchitis |
| J42 | Unspecified chronic bronchitis |
| J44.0 | Chronic obstructive pulmonary disease with acute lower respiratory infection |
| J44.1 | Chronic obstructive pulmonary disease with acute exacerbation, unspecified |
| J69 | Pneumonitis due to solids and liquids |
| J85-J86 | Suppurative and necrotic conditions of lower respiratory tract |
| J95.0 | Tracheostomy malfunction |
| K04.0 | Pulpitis |
| K04.1 | Necrosis of pulp |
| K04.4 | Acute apical periodontitis of pulpal origin |
| K04.5 | Chronic apical periodontitis |
| K04.6 | Periapical abscess with sinua |
| K04.7 | Periapical abscess without sinus |
| K05.0 | Acute gingivitis |
| K05.1 | Chronic gingivitis |
| K05.2 | Acute periodontitis |
| K05.3 | Chronic periodontitis |
| K10.2 | Inflammatory conditions of jaws |
| K10.3 | Alveolitis of jaws |
| K11.2 | Sialoadenitis |
| K11.3 | Abscess of salivary gland |
| K11.4 | Fistula of salivary gland |
| K12 | Stomatitis and related lesions |
| K13.0 | Disease of lips |
| K14.0 | Glossitis |
| K20 | Oesophagitis |
| K22.3 | Perforation of oesophagus |
| K23.0 | Tuberculous oesophagitis |
| K25.1 | Acute gastric ulcer with perforation |
| K25.2 | Acute gastric ulcer with both haemorrhage and perforation |
| K25.5 | Chronic gastric ulcer with perforation |
| K26.1 | Acute duodenal ulcer with perforation |
| K26.2 | Acute duodenal ulcer with both haemorrhage and perforation |
| K26.5 | Chronic duodenal ulcer with perforation |
| K26.6 | Duodenal ulcer, chronic or unspecified with both haemorrhage and perforation |
| K27.1 | Acute peptic ulcer with perforation, site unspecified |
| K27.2 | Acute peptic ulcer with both haemorrhage and perforation, site unspecified |
| K27.5 | Chronic peptic ulcer with perforation, site unspecified |
| K27.6 | Chronic peptic ulcer, chronic or unspecified with both haemorrhage and perforation |
| K28.1 | Acute gastrojejunal ulcer with perforation |
| K28.2 | Acute gastrojejunal ulcer with both haemorrhage and perforation |
| K28.5 | Chronic gastrojejunal ulcer with perforation |
| K31.6 | Fistula of stomach and duodenum |
| K35 | Acute appendicitis |
| K36 | Other appendicitis |
| K37 | Unspecified appendicitis |
| K38.3 | Fistula of appendix |
| K40.1 | Bilateral inguinal hernia, with gangrene |
| K40.4 | Unilateral or unspecified inguinal hernia, with gangrene |
| K41.1 | Bilateral femoral hernia, with gangrene |
| K41.4 | Unilateral or unspecified femoral hernia, with gangrene |
| K42.1 | Umbilical hernia, with gangrene |
| K43.1 | Ventral hernia, with gangrene |
| K44.1 | Diaphragmatic hernia, with gangrene |
| K45.1 | Other specified abdominal hernia, with gangrene |
| K46.1 | Unspecified abdominal hernia, with gangrene |
| K55.0 | Acute vascular disorders of intestine |
| K57.0 | Diverticular disease of small intestine with perforation and abscess |
| K57.2 | Diverticular disease of large intestine with perforation and abscess |
| K57.4 | Diverticular disease of both small and large intestine with perforation and abscess |
| K57.8 | Diverticular disease of intestine, part unspecified, with perforation and abscess |
| K60.3 | Anal fistula |
| K60.4 | Rectal fistula |
| K60.5 | Anorectal fistula |
| K61 | Abscess of anal and rectal regions |
| K63.0 | Abscess of intestine |
| K63.1 | Perforation of intestine (nontraumatic) |
| K63.2 | Fistula of intestine |
| K65.0 | Acute peritonitis |
| K65.9 | Peritonitis, unspecified |
| K67 | Disorders of peritoneum in infectious diseases classified elsewhere |
| K75.0 | Abscess of liver |
| K75.1 | Phlebitis of portal vein |
| K77.0 | Liver disorders in infectious and parasitic diseases classified elsewhere |
| K80.0 | Calculus of gallbladder with acute cholecystitis |
| K80.1 | Calculus of gallbladder with other cholecystitis |
| K80.3 | Calculus of bile duct with cholangitis |
| K80.4 | Calculus of bile duct with cholecystitis |
| K81 | Cholecystitis |
| K82.2 | Perforation of gallbladder |
| K82.3 | Fistula of gallbladder |
| K83.0 | Cholangitis |
| K83.2 | Perforation of bile duct |
| K83.3 | Fistula of bile duct |
| K85 | Acute pancreatitis |
| K87 | Disorders of gallbladder, biliary tract and pancreas in diseases classified elsewhere |
| L00-L08 | Infections of the skin and subcutaneous tissue |
| M00-M03 | Infectious arthropathies |
| M49.0 | Tuberculosis of spine |
| M49.1 | Brucella spondylitis |
| M49.2 | Enterobacterial spondylitis |
| M49.3 | Spondylopathy in other infectious and parasitic diseases classified elsewhere |
| M60.0 | Infective myositis |
| M63.0 | Myositis in bacterial diseases classified elsewhere |
| M63.1 | Myositis in protozoal and parasitic infections classified elsewhere |
| M63.2 | Myositis in other infectious diseases classified elsewhere |
| M65.0 | Abscess of tendon sheath |
| M65.1 | Other infective (teno)synovitis |
| M68.0 | Synovitis and tenosynovitis in bacterial diseases classified elsewhere |
| M71.0 | Abscess of bursa |
| M71.1 | Other infective bursitis |
| M72.6 | Necrotising fasciitis |
| M72.8 | Other fibroblastic disorders |
| M73.0 | Gonococcal bursitis |
| M73.1 | Syphilitic bursitis |
| M86 | Osteomyelitis |
| M90.0 | Tuberculosis of bone |
| M90.1 | Periositis in other infectious diseases classified elsewhere |
| M90.2 | Osteopathy in other infectious diseases classified elsewhere |
| N08.0 | Glomerular disorders in infectious and parasitic diseases classified elsewhere |
| N13.6 | Pyonephrosis |
| N15.1 | Renal and perinephric abscess |
| N15.9 | Renal tubulo-interstitial disease, unspecified |
| N16.0 | Renal tubulo-interstitial disorders in infectious and parasitic diseases classified elsewhere |
| N22.0 | Urinary calculus in schistosomiasis |
| N29.0 | Late syphilis of kidney |
| N29.1 | Other disorders of kidney and ureter in infectious and parasitic diseases classified elsewhere |
| N30.0 | Acute cystitis |
| N30.3 | Trigonitis |
| N30.8 | Other cystitis |
| N32.1 | Vesicointestinal fistula |
| N32.3 | Diverticulum of bladder |
| N33 | Bladder disorders in diseases classified elsewhere |
| N34.0 | Urethral abscess |
| N34.2 | Other urethritis |
| N36.0 | Urethral fistula |
| N37.0 | Urethritis in diseases classified elsewhere |
| N39.0 | Urinary tract infection, site not specified |
| N41.0 | Acute prostatitis |
| N41.2 | Abscess of prostate |
| N41.3 | Prostatocystitis |
| N43.1 | Infected hydrocele |
| N45 | Orchitis and epididymitis |
| N48.1 | Balanoposthitis |
| N48.2 | Other inflammatory disorders of penis |
| N49 | Inflammatory disorders of male genital organs, not elsewhere classified |
| N51 | Disorders of male genital organs in diseases classified elsewhere |
| N61 | Inflammatory disorders of breast |
| N70-N77 | Inflammatory diseases of female pelvic organs |
| O07.0 | Failed medical abortion, complicated by genital tract and pelvic infection |
| O07.5 | Other and unspecified failed attempted abortion, complicated by genital tract and pelvic infection |
| O08.0 | Genital tract and pelvic infection following abortion and ectopic and molar pregnancy |
| O23 | Infections of genitourinary tract in pregnancy |
| O29.0 | Pulmonary complications of anaesthesia during pregnancy |
| O41.1 | Infection of amniotic sac and membranes |
| O74.0 | Aspiration pneumonitis due to anaesthesia during labour and delivery |
| O75.3 | Other infection during labour |
| O85 | Puerperal sepsis |
| O86 | Other puerperal infections |
| O89.0 | Pulmonary complications of anaesthesia during the puerperium |
| O91 | Infections of breast associated with childbirth |
| O98 | Maternal infectious and parasitic diseases classifiable elsewhere but complicating pregnancy, childbirth and the puerperium |
| P23 | Congenital pneumonia |
| P24 | Neonatal aspiration syndromes |
| P35-P39 | Infections specific to the perinatal period |
| P77 | Necrotizing entrocolitis of fetus and newborn |
| P78.0 | Perinatal intestinal perforation |
| P78.1 | Other neonatal peritonitis |
| R02 | Gangrene, not elsewhere classified |
| R09.1 | Pleurisy |
| R10.0 | Acute abdomen |
| R57.8 | Other shock |
| R65.0 | Systemic inflammatory response syndrome of infectious origin without organ failure |
| R65.1 | Systemic inflammatory response syndrome of infectious origin with organ failure |
| S36.3 | Injury of stomach |
| S36.4 | Injury of small intestine |
| S36.5 | Injury of colon |
| S36.6 | Injury of rectum |
| T80.2 | Infections following infusion, transfusion and therapeutic injection |
| T81.4 | Infection following a procedure, not elsewhere classified |
| T82.6 | Infection and inflammatory reaction due to cardiac valve prosthesis |
| T82.7 | Infection and inflammatory reaction due to other cardiac and vascular devices, implants and grafts |
| T83.5 | Infection and inflammatory reaction due to prosthetic device, implant and graft in urinary tract |
| T83.6 | Infection and inflammatory reaction due to prosthetic device, implant and graft in genital tract |
| T84.5 | Infection and inflammatory reaction due to internal joint prosthesis |
| T84.6 | Infection and inflammatory reaction due to internal fixation device [any site] |
| T85.7 | Infection and inflammatory reaction due to other internal prosthetic devices, implants and grafts |
| T87.4 | Infection of amputation stump |
| T88.0 | Infection following immunization |

# Table S5. International Statistical Classification of Diseases And Related Health Problems 10th Revision (ICD-10) Version For Acute Organ Dysfunction Related Diagnosis

| System | ICD-10-CM | Codes Description |
| --- | --- | --- |
| Cardiovascular | A41.9 | Septic shock |
|  | A48.3 | Toxic shock syndrome |
|  | E86.x00 | Volume depletion |
|  | E86.x00x001 | hypovolemia |
|  | E86.x00x003 | extracellular fluid deletion |
|  | E86.x00x004 | Plasma volume depletion |
|  | E86.x00x005 | Volume depletion |
|  | E86.x01 | dehydration |
|  | I51.400x007 | Severe Myocarditis |
|  | I95.8 | Hypotension, unspecified |
|  | I95.9 | Hypotension, |
|  | I99.x00 | Other disorders of the circulatory system |
|  | I99.x01 | Circulatory disorders |
|  | R09.800x082 | Weak pulse |
|  | R57.0 | Cardiogenic shock |
|  | R57.1 | Hypovolaemic shock |
|  | R57.2 | Septic shock |
|  | R57.8 | Other shock |
|  | R57.9 | Shock, unspecified |
|  | O03.300x001 | Spontaneous abortion, Incomplete, with septic shock |
|  | O03.800x001 | Spontaneous abortion, Complete, with septic shock |
|  | O04.300x004 | Medical abortion, Incomplete, with septic shock |
|  | O04.800x001 | Medical abortion, Complete, with septic shock |
|  | O04.804 | Medical abortion, later complete, with septic shock |
|  | P29 | Cardiovascular disorders originating in the perinatal period |
|  |  |  |
| Respiratory | J80 | Acute respiratory distress syndrome |
|  | J81 | Pulmonary oedema |
|  | J95.100 | Acute pulmonary insufficiency after thoracic surgery |
|  | J95.200 | Acute pulmonary insufficiency after non-thoracic surgery |
|  | J95.800x004 | Respiratory failure after surgical procedures |
|  | J95.800x021 | Respiratory distress syndrome in adults after surgery |
|  | J96 | Acute respiratory failure with hypoxia, not elsewhere classified |
|  | J96.9 | Respiratory failure, unspecified with hypoxia |
|  | J98.4 | Other disorders of lung |
|  | J98.400x024 | Severe infection of the lungs |
|  | P22 | Respiratory distress of newborn |
|  | P28.5 | Respiratory failure of newborn |
|  | R09.0 | Asphyxia |
|  | R09.000 | suffocate |
|  | R09.2 | Respiratory arrest |
|  | R09.800x095 | Asthma |
|  | U04.9 | Severe acute respiratory syndrome [SARS], unspecified |
|  |  |  |
| Central nervous system | F05 | Delirium (not alcohol- or drug-induced) |
|  | F06.8 | Other specified mental disorders due to infection |
|  | G93.1 | Anoxic brain damage, not elsewhere classified |
|  | G93.4 | Encephalopathy, unspecified |
|  | G93.8 | Other specified disorders of brain |
|  | G93.9 | Disorder of brain, unspecified |
|  | R40 | Somnolence, stupor and coma |
|  | R41.0 | Disorientation, unspecified |
|  | R45.3 | Demoralization and apathy |
|  | R55 | Syncope and collapse |
|  |  |  |
| Renal | A98.500 | Haemorrhagic fever with renal syndrome |
|  | N17 | Acute kidney failure |
|  | N19 | Unspecified kidney failure |
|  | R34 | Anuria and oliguria |
|  | R39.2 | Extrarenal uraemia |
|  | R94.4 | Abnormal results of kidney function studies |
|  |  |  |
| Metabolic | E87.2 | Acidosis |
|  |  |  |
| Hematologic | A93.800x001 | Other specified arthropod-borne viral fevers [Piry virus disease] |
|  | D61.900x001 | Bone marrow suppression |
|  | D61.901 | Myelosuppressive anemia |
|  | D61.903 | Pancytopenia |
|  | D61.906 | Acute bone marrow hematopoietic function inhibition |
|  | D65 | Disseminated intravascular coagulation [defibrination syndrome] |
|  | D65.x00x003 | Gangrene purpura |
|  | D65.x01 | Acquired fibrinogen deficiency |
|  | D65.x02 | Acquired fibrinolytic bleeding |
|  | D65.x03 | Fibrinolytic purpura |
|  | D68.9 | Coagulation defect, unspecified |
|  | D69.000x008 | Infectious purpura |
|  | D69.000x011 | Bacterial purpura |
|  | D69.000x013 | Toxic purpura |
|  | D69.203 | purpura |
|  | D69.301 | Hemorrhagic purpura |
|  | D69.5 | Secondary thrombocytopenia |
|  | D69.501 | Secondary thrombocytopenic purpura |
|  | D69.6 | Thrombocytopenia, unspecified |
|  | D69.8 | Other specified haemorrhagic conditions |
|  | D76.200x001 | Infectious hemophagocytic syndrome |
|  | D76.200x011 | Infectious erythrophagocytic syndrome |
|  |  |  |
| Hepatic | B15.000 | Hepatitis A, accompanied by hepatic coma |
|  | B15.001 | Acute viral hepatitis A with hepatic coma |
|  | B15.002 | Acute severe severe viral hepatitis A with hepatic coma |
|  | B15.003 | Subacute severe viral hepatitis A with hepatic coma |
|  | B16.000 | Acute hepatitis B, with δ factor (co-infection) and accompanied by hepatic coma |
|  | B16.001 | Acute hepatitis B-D with hepatic coma |
|  | B16.200 | Acute hepatitis B, not accompanied by δ factor (co-infection), but with hepatic coma |
|  | B16.201 | Acute viral hepatitis B with hepatic coma |
|  | B16.202 | Subacute severe viral hepatitis B with hepatic coma |
|  | B16.203 | Acute severe hepatitis B with hepatic coma |
|  | B16.204 | Acute jaundice-free hepatitis B with hepatic coma |
|  | B16.206 | Acute severe hepatitis B with hepatic coma |
|  | B17.807 | Acute severe hepatitis hepatitis |
|  | B19.000 | Viral hepatitis, accompanied by hepatic coma |
|  | B19.000x001 | Viral hepatitis with hepatic coma |
|  | B19.001 | Acute severe viral hepatitis with hepatic coma |
|  | B19.002 | Subacute severe viral hepatitis with hepatic coma |
|  | B25.101† | Cytome hepatitis with hepatic coma |
|  | E80.600 | Bilirubin metabolism disorders, others |
|  | E80.604 | Hyperbilirubinemia |
|  | E80.700 | Bilirubin metabolism disorders |
|  | K71.100x001 | Toxic liver disease with liver failure |
|  | K71.103 | Toxic liver failure |
|  | K72.0 | Acute and subacute hepatic failure |
|  | K72.9 | Hepatic failure, unspecified |
|  | K76.7 | Hepatorenal syndrome |
|  | K76.8 | Other specified diseases of liver |
|  | K76.9 | Liver disease, unspecified |
|  | K91.825 | Liver failure after surgery |
|  |  |  |
| Others | A01.003 | Typhoid fever sepsis |
|  | A02.100 | Salmonella sepsis |
|  | A03.900 | Shigellosis, unspecified (shock) |
|  | A09.005 | Septic gastroenteritis |
|  | A20.7 | Septicemic plague |
|  | A21.7 | Generalized tularemia |
|  | A22.7 | Anthrax sepsis |
|  | A24.1 | Acute and fulminating melioidosis |
|  | A26.7 | Erysipelothrix sepsis |
|  | A27.900 | Leptospirosis |
|  | A28.001 | Pasteurellosis |
|  | A28.2 | Extraintestinal yersiniosis |
|  | A32.7 | Listerial sepsis |
|  | A38.x00x012 | Scarlet fever sepsis |
|  | A39.2 | Acute meningococcemia |
|  | A39.3 | Chronic meningococcemia |
|  | A39.4 | Meningococcemia， unspecified |
|  | A39.1 | Waterhouse |
|  | A40. | Streptococcal sepsis |
|  | A41. | Other sepsis |
|  | A42.7 | Actinomycotic sepsis |
|  | A49.103 | Streptococcal infection syndrome |
|  | A54.8 | Other gonococcal infections (sepsis) |
|  | A88.800x001 | Polio-like syndrome |
|  | B00.7 | Herpetic septicemia |
|  | B37.7 | Candidal sepsis |
|  | B37.6 | Candidal endocarditis |
|  | B49 | Unspecified mycosis (Fungemia) |
|  | D71.x00x005 | Progressive septic granulomatous disease |
|  | J15.903 | Bacterial pneumonia, unspecified (severe community-acquired) |
|  | J18.903 | Pneumonia, unspecified (severe) |
|  | J95.000x001 | Sepsis of tracheostomy stoma |
|  | O08.000x006 | Sepsis following abortion and ectopic and molar pregnancy |
|  | O08.200x002 | Embolism following abortion and ectopic and molar pregnancy (septic) |
|  | O08.200x006 | Embolism following abortion and ectopic and molar pregnancy (septicopyaemic) |
|  | O85 | Puerperal sepsis |
|  | O88.300 | Obstetric pyaemic and septic embolism |
|  | P36 | Bacterial sepsis of newborn |
|  | P37.800x002 | Other specified congenital infectious and parasitic diseases |
|  | R09.800 | Involves other specific signs and symptoms of the circulatory and respiratory systems |
|  | R65.1 | Systemic inflammatory response syndrome (SIRS) due to infection with organ dysfunction |
|  | T80.2 | Infections following infusion, transfusion and therapeutic injection |
|  | T81.4 | Infection following a procedure, not elsewhere classified |
|  | T88.000x002 | Sepsis following immunization |
|  |  |  |
| Multiple | R68.800x001 | Multiple organ failure |

# Table S6. International Statistical Classification Of Diseases And Related Health Problems, 9th Revision, Clinical Modification, 3rd Volume(ICD-9-CM-3) Version for Acute Organ Dysfunction Related Procedures

| Organ | ICD-9-CM | Codes Description |
| --- | --- | --- |
| Respiratory | 311 | Temporary tracheostomy |
| Cardiovascular | 3129 | Other permanent tracheostomy |
| Cardiovascular | 3893 | Venous catheterization, not elsewhere classified |
| Renal | 3895 | Venous catheterization for renal dialysis |
| Cardiovascular | 3897 | Central venous catheter placement with guidance |
| Cardiovascular | 3899 | Other puncture of vein |
| Renal | 3927 | Arteriovenostomy for renal dialysis |
| Renal | 3942 | Revision of arteriovenous shunt for renal dialysis |
| Others | 3965 | Extracorporeal membrane oxygenation [ECMO] |
| Renal | 3995 | Hemodialysis |
| Hepatic | 5092 | Extracorporeal hepatic assistance |
| Renal | 5498 | Peritoneal dialysis |
| Respiratory | 9390 | Non-invasive mechanical ventilation |
| Respiratory | 9391 | Intermittent positive pressure breathing [IPPB] |
| Others | 9393 | Nonmechanical methods of resuscitation |
| Respiratory | 9604 | Insertion of endotracheal tube |
| Respiratory | 9670 | Continuous invasive mechanical ventilation of unspecified duration |
| Respiratory | 9671 | Continuous invasive mechanical ventilation for less than 96 consecutive hours |
| Respiratory | 9672 | Continuous invasive mechanical ventilation for 96 consecutive hours or more |
| Others | 9960 | Cardiopulmonary resuscitation, not otherwise specified |
| Others | 9962 | Other electric countershock of heart |
| Others | 9963 | Closed chest cardiac massage |

# Table S7. Martin GS's Coding According To ICD-9-CM Version for Infection

| 038 | Septicemia |
| --- | --- |
| 020.0 | Septicemic |
| 790.7 | Bacteremia |
| 117.9 | Disseminated fungal infection |
| 112.5 | Disseminated candida infection |
| 112.81 | Disseminated fungal endocarditis |

# Table S8. Martin GS's Coding According To ICD-9-CM Version for Acute Organ Dysfunction

| Respiratory | 518.81 | Acute respiratory failure |
| --- | --- | --- |
|  | 518.82 | Acute respiratory distress syndrome |
|  | 518.85 | Acute respiratory distress syndrome after shock or trauma |
|  | 786.09 | Respiratory insufficiency |
|  | 799.1 | Respiratory arrest |
|  | 96.7 | Ventilator management |
| Cardiovascular | 458.0 | Hypotension, postural |
|  | 785.5 | Shock |
|  | 785.51 | Shock, cardiogenic |
|  | 785.59 | Shock, circulatory or septic |
|  | 458.8 | Hypotension, specified type, not elsewhere classified |
|  | 458.9 | Hypotension, arterial, constitutional |
|  | 796.3 | Hypotension, transient |
| Renal | 584 | Acute renal failure |
|  | 580 | Acute glomerulonephritis |
|  | 585 | Renal shutdown, unspecified |
|  | 39.95 | Hemodialysis |
| Hepatic | 570 | Acute hepatic failure or necrosis |
|  | 572.2 | Hepatic encephalopathy |
|  | 573.3 | Hepatitis, septic or unspecified |
| Hematologic | 286.2 | Disseminated intravascular coagulation |
|  | 286.6 | Purpura fulminans |
|  | 286.9 | Coagulopathy |
|  | 287.3-5 | Thrombocytopenia, primary, secondary, or unspecified |
| Metabolic | 276.2 | Acidosis, metabolic or lactic |
| Neurologic | 293 | Transient organic psychosis |
|  | 348.1 | Anoxic brain injury |
|  | 348.3 | Encephalopathy, acute |
|  | 780.01 | Coma |
|  | 780.09 | Altered consciousness, unspecified |
|  | 89.14 | Electroencephalopathy |

# Table S9. Angus DC's Coding According To ICD-9-CM Version for Infection

| 001 | Cholera |
| --- | --- |
| 002 | Typhoid/paratyphoid fever |
| 003 | Other salmonella infection |
| 004 | Shigellosis |
| 005 | Other food poisoning |
| 008 | Intestinal infection not otherwise classified |
| 009 | Ill-defined intestinal infection |
| 010 | Primary tuberculosis |
| 011 | Pulmonary tuberculosis |
| 012 | Other respiratory tuberculosis |
| 013 | Central nervous system tuberculosis |
| 014 | Intestinal tuberculosis |
| 015 | Tuberculosis of bone and joint |
| 016 | Genitourinary tuberculosis |
| 017 | Tuberculosis not otherwise classified |
| 018 | Military tuberculosis |
| 020 | Plague |
| 021 | Tularemia |
| 022 | Anthrax |
| 023 | Brucellosis |
| 024 | Glanders |
| 025 | Melioidosis |
| 026 | Rat-bite fever |
| 027 | Other bacterial zoonoses |
| 030 | Leprosy |
| 031 | Other mycobacterial disease |
| 032 | Diphtheria |
| 033 | Whooping cough |
| 034 | Streptococcal throat/scarlet fever |
| 035 | Erysipelas |
| 036 | Meningococcal infection |
| 037 | Tetanus |
| 038 | Septicemia |
| 039 | Actinomycotic infections |
| 040 | Other bacterial diseases |
| 041 | Bacterial infection in other diseases not otherwise specified |
| 090 | Congenital syphilis |
| 091 | Early symptomatic syphilis |
| 092 | Early syphilis latent |
| 093 | Cardiovascular syphilis |
| 094 | Neurosyphilis |
| 095 | Other late symptomatic syphilis |
| 096 | Late syphilis latent |
| 097 | Other and unspecified syphilis |
| 098 | Gonococcal infections |
| 100 | Leptospirosis |
| 101 | Vincent’s angina |
| 102 | Yaws |
| 103 | Pinta |
| 104 | Other spirochetal infection |
| 110 | Dermatophytosis |
| 111 | Dermatomycosis not otherwise classified or specified |
| 112 | Candidiasis |
| 114 | Coccidioidomycosis |
| 115 | Histoplasmosis |
| 116 | Blastomycotic infection |
| 117 | Other mycoses |
| 118 | Opportunistic mycoses |
| 320 | Bacterial meningitis |
| 322 | Meningitis, unspecified |
| 324 | Central nervous system abscess |
| 325 | Phlebitis of intracranial sinus |
| 420 | Acute pericarditis |
| 421 | Acute or subacute endocarditis |
| 451 | Thrombophlebitis |
| 461 | Acute sinusitis |
| 462 | Acute pharyngitis |
| 463 | Acute tonsillitis |
| 464 | Acute laryngitis/tracheitis |
| 465 | Acute upper respiratory infection of multiple sites/not otherwise specified |
| 481 | Pneumococcal pneumonia |
| 482 | Other bacterial pneumonia |
| 485 | Bronchopneumonia with organism not otherwise specified |
| 486 | Pneumonia, organism not otherwise specified |
| 491.21 | Acute exacerbation of obstructive chronic bronchitis |
| 494 | Bronchiectasis |
| 510 | Empyema |
| 513 | Lung/mediastinum abscess |
| 540 | Acute appendicitis |
| 541 | Appendicitis not otherwise specified |
| 542 | Other appendicitis |
| 562.01 | Diverticulitis of small intestine without hemorrhage |
| 562.03 | Diverticulitis of small intestine with hemorrhage |
| 562.11 | Diverticulitis of colon without hemorrhage |
| 562.13 | Diverticulitis of colon with hemorrhage |
| 566 | Anal and rectal abscess |
| 567 | Peritonitis |
| 569.5 | Intestinal abscess |
| 569.83 | Perforation of intestine |
| 572.0 | Abscess of liver |
| 572.1 | Portal pyema |
| 575.0 | Acute cholecystitis |
| 590 | Kidney infection |
| 597 | Urethritis/urethral syndrome |
| 599.0 | Urinary tract infection not otherwise specified |
| 601 | Prostatic inflammation |
| 614 | Female pelvic inflammation disease |
| 615 | Uterine inflammation disease |
| 616 | Other female genital inflammation |
| 681 | Cellulitis, finger/toe |
| 682 | Other cellulitis or abscess |
| 683 | Acute lymphadenitis |
| 686 | Other local skin infection |
| 711.0 | Pyogenic arthritis |
| 730 | Osteomyelitis |
| 790.7 | Bacteremia |
| 996.6 | Infection or inflammation of device/graft |
| 998.5 | Postoperative infection |
| 999.3 | Infectious complication of medical care not otherwise classified |

# Table S10. Angus DC's Coding According To ICD-9-CM Version for Acute Organ Dysfunction

| Cardiovascular | 785.5 | Shock without trauma |
| --- | --- | --- |
|  | 458 | Hypotension |
| Respiratory | 96.7 | Mechanical ventilation |
| Neurologic | 348.3 | Encephalopathy |
|  | 293 | Transient organic psychosis |
|  | 348.1 | Anoxic brain damage |
| Hematologic | 287.4 | Secondary thrombocytopenia |
|  | 287.5 | Thrombocytopenia, unspecified |
|  | 286.9 | Other/unspecified coagulation defect |
|  | 286.6 | Defibrination syndrome |
| Hepatic | 570 | Acute and subacute necrosis of liver |
|  | 573.4 | Hepatic infarction |
| Renal | 584 | Acute renal failure |

# Table S11. Weighted index of Charlson comorbidity

| Assigned weights for diseases | Conditions |
| --- | --- |
| 1 | Myocardial infarct |
|  | Congestive heart failure |
|  | Peripheral vascular disease |
|  | Cerebrovascular disease |
|  | Dementia |
|  | Chronic pulmonary disease |
|  | Connective tissue disease |
|  | Ulcer disease |
|  | Diabetes |
|  | Mild liver disease |
| 2 | Hemiplegia |
|  | Moderate or severe renal disease |
|  | Diabetes with end organ damage |
|  | Any tumor |
|  | Leukemia |
|  | Lymphoma |
| 3 | Moderate or severe liver disease |
| 6 | Metastatic solid tumor |
|  | AIDS |

Assigned weights for each condition that a patient has. The total equals the score. Example: chronic pulmorary (1) and lymphoma (2)=total score (3).

# Table S12. Positive and negative likelihood ratios of Different ICD-Coded Algorithms and eSOFA Criteria for Identification of Sepsis

|  | **Positive likelihood ratios** | **Negative likelihood ratios** |
| --- | --- | --- |
| **No-ICU (n=409)** | | |
| Modified ICD-10 | 3.21 | 2.23 |
| Angus's criteria | 4.04 | 1.34 |
| Martin's criteria | 9.63 | 1.24 |
| eSOFA criteria | 3.54 | 2.42 |
| **ICU (n=138)** | | |
| Modified ICD-10 | 7.39 | 5.70 |
| Angus's criteria | - | 1.37 |
| Martin's criteria | - | 1.53 |
| eSOFA criteria | 3.82 | 6.11 |
| **ICU and non-ICU (n=547)** |  |  |
| Modified ICD-10 | 3.79 | 2.76 |
| Angus's criteria | 4.62 | 1.56 |
| Martin's criteria | 13.76 | 1.32 |
| eSOFA criteria | 2.65 | 3.51 |

# Figure S1. Accuracy of ICD codes from different provinces from Hospital Quality Monitoring System (HQMS) https://www.hqms.org.cn/login.jsp13


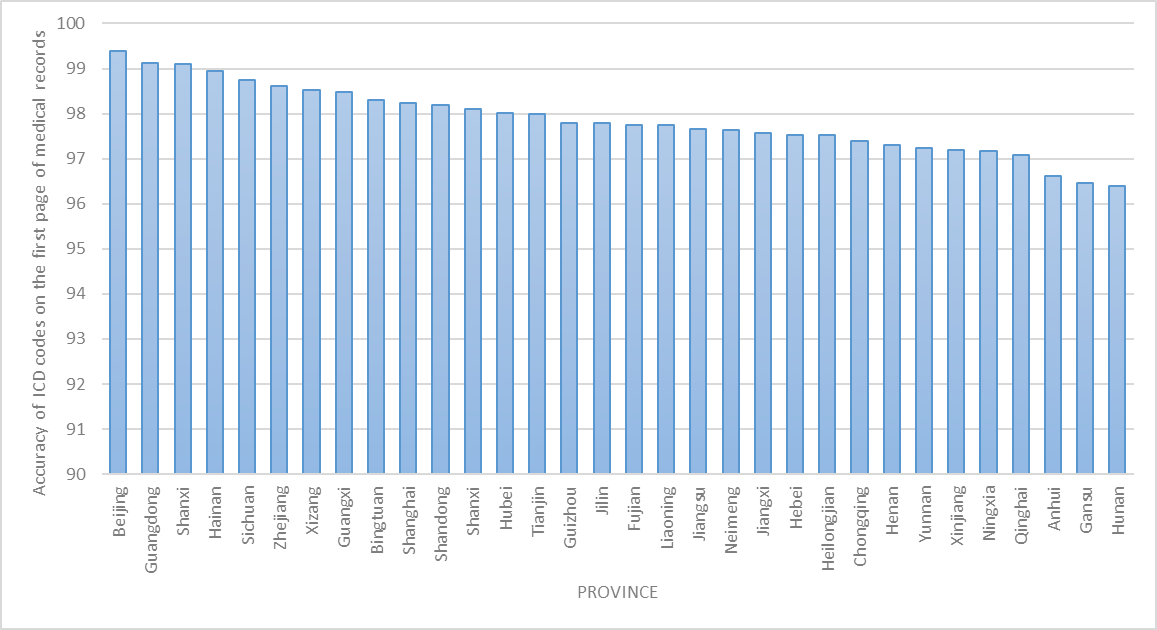


**Reference**

1. Martin GS, Moss M. The Epidemiology of Sepsis in the United States from 1979 through 2000. *The New England Journal of Medicine* (2003)

2. Whittaker S-A, Mildcelsen ME, Gaieski DE, Koshy S, Kean C, Euchs BD. Severe Sepsis Cohorts Derived From Claims-Based Strategies Appear to be Biased Toward a More Severely III Patient Population. *Critical Care Medicine*10.

3. Iwashyna TJ, Odden A, Rohde J, Bonham C, Kuhn L, Malani P, Chen L, Flanders S. Identifying Patients With Severe Sepsis Using Administrative Claims: Patient-Level Validation of the Angus Implementation of the International Consensus Conference Definition of Severe Sepsis. *Medical Care* (2014) 52:e39–e43. doi: 10.1097/MLR.0b013e318268ac86

4. Gedeborg R, Furebring M, Michaelsson K. Diagnosis-dependent misclassiﬁcation of infections using administrative data variably affected incidence and mortality estimates in ICU patients. *Journal of Clinical Epidemiology* (2007)

5. Ramanathan R, Leavell P, Stockslager G, Mays C, Harvey D, Duane TM. Validity of International Classification of Diseases, Ninth Revision, Clinical Modification (ICD-9-CM) Screening for Sepsis in Surgical Mortalities. *Surgical Infections* (2014) 15:513–516. doi: 10.1089/sur.2013.089

6. Jolley RJ, Sawka KJ, Yergens DW, Quan H, Jetté N, Doig CJ. Validity of administrative data in recording sepsis: a systematic review. *Crit Care* (2015) 19:139. doi: 10.1186/s13054-015-0847-3

7. Rhee C, Dantes R, Epstein L, Murphy DJ, Seymour CW, Iwashyna TJ, Kadri SS, Angus DC, Danner RL, Fiore AE, et al. Incidence and Trends of Sepsis in US Hospitals Using Clinical vs Claims Data, 2009-2014. *JAMA* (2017) 318:1241. doi: 10.1001/jama.2017.13836

8. Rhee C, Jentzsch MS, Kadri SS, Seymour CW, Angus DC, Murphy DJ, Martin GS, Dantes RB, Epstein L, Fiore AE, et al. Variation in Identifying Sepsis and Organ Dysfunction Using Administrative Versus Electronic Clinical Data and Impact on Hospital Outcome Comparisons*: *Critical Care Medicine* (2019) 47:493–500. doi: 10.1097/CCM.0000000000003554

9. Talmor D, Greenberg D, Howell MD, Lisbon A, Novack V, Shapiro N. The costs and cost-effectiveness of an integrated sepsis treatment protocol: *Critical Care Medicine* (2008) 36:1168–1174. doi: 10.1097/CCM.0b013e318168f649

10. Fleischmann-Struzek C, Thomas-Rüddel DO, Schettler A, Schwarzkopf D, Stacke A, Seymour CW, Haas C, Dennler U, Reinhart K. Comparing the validity of different ICD coding abstraction strategies for sepsis case identification in German claims data. *PLoS ONE* (2018) 13:e0198847. doi: 10.1371/journal.pone.0198847

11. Cevasco M, Borzecki AM, Chen Q, Zrelak PA, Shin M, Romano PS, Itani KMF, Rosen AK. Positive Predictive Value of the AHRQ Patient Safety Indicator “Postoperative Sepsis”: Implications for Practice and Policy. *Journal of the American College of Surgeons* (2011) 212: https://journals.lww.com/journalacs/Fulltext/2011/06000/Positive_Predictive_Value_of_the_AHRQ_Patient.5.aspx

12. Ibrahim I, Jacobs IG, Webb SA, Finn J. Accuracy of International classification of diseases,10th revision codes for identifying severe sepsis in patients admitted from the emergency department. Crit Care Resusc. 2012 Jun;14(2):112-8. PMID: 22697618.

13. National Health Commission. The National Health Service and Quality Safety Report 2022. ISBN978-7-5189-9375-8. 392-393.
